# Supplementary material
Source: PubMed Central journal article supplement (PMC3075539)
Supplement: NIHMS253963-supplement-1.pdf [file NIHMS253963-supplement-1.pdf]

**AACR-affiliated Image-Guided Drug  
Delivery (IGDD) Summit**  
April 17, 2010

**Roster of Presenters**

**Esther H. Chang, PhD**  
Professor, Department of Oncology  
Lombardi Comprehensive Cancer Center  
Georgetown University Medical Center  
Washington, D.C.

**Keyvan Farahani, PhD**  
Branch Chief (acting)  
Image-Guided Interventions Branch  
Cancer Imaging Program  
National Cancer Institute  
National Institutes of Health  
Bethesda, Maryland

**Piotr Grodzinski, PhD**  
Director, NCI Alliance for Nanotechnology  
in Cancer  
Office of the Director, National Cancer  
Institute  
Bethesda, Maryland

**Gary Kelloff, MD**  
Advisor to Associate Director  
Cancer Imaging Program  
National Cancer Institute  
Bethesda, Maryland

**Gregory Lanza, MD PhD**  
Professor of Medicine  
Washington University Medical School  
St. Louis, Missouri

**Chrit Moonen, PhD**  
Director  
Laboratory for Molecular and Functional  
Imaging  
University Victor Segalen Bordeaux  
Bordeaux, France

**Anil K. Patri, PhD**  
Deputy Director  
Nanotechnology Characterization  
Laboratory  
SAIC-Frederick, Inc. (Contractor)  
National Cancer Institute at Frederick  
Frederick, Maryland

**Nakissa Sadrieh, PhD**  
Associate Director for Research Policy  
Implementation  
CDER/OPS  
Food and Drug Administration  
Silver Spring, Maryland

**Jan E. Schnitzer, MD**  
Director  
Professor of Cellular & Molecular Biology  
Proteogenomics Research Institute for  
Systems Medicine  
San Diego, California
